# Supplementary material
Source: MDPI journal article supplement (https://www.mdpi.com/2079-6412/7/9/138)
Supplement: s1 [file s1]

## Supplementary Materials

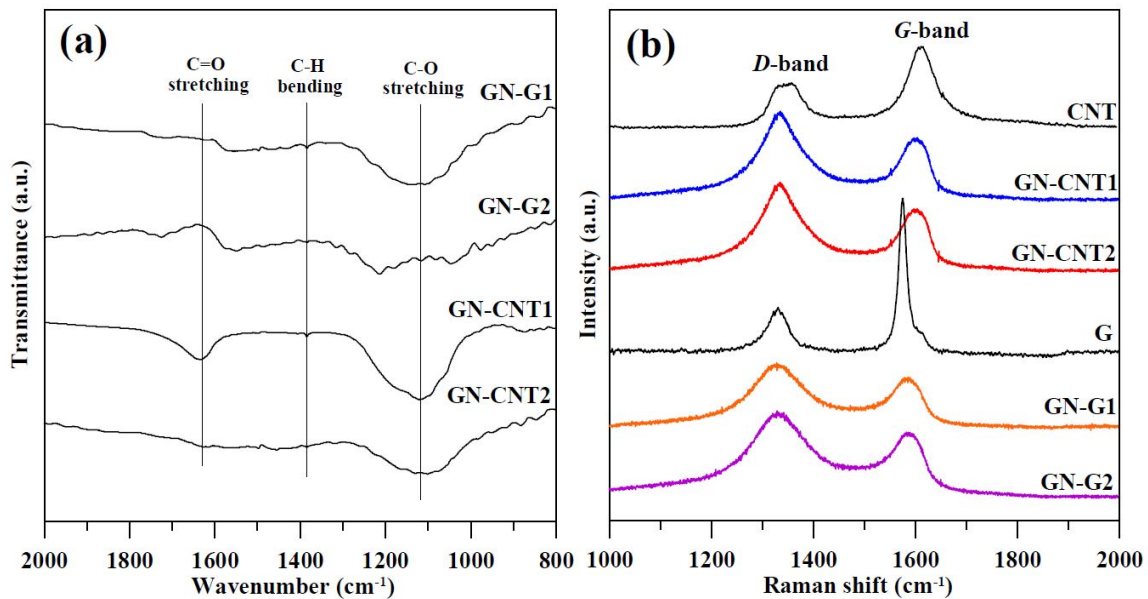

**Figure S1.** (a) FT-IR patterns and (b) Raman spectra of different graphene samples. This reflects that the first-step chemical oxidation efficiently facilitates the oxidation level of grapheme samples, whereas the second-step oxidation, followed by thermal reduction, is capable of stripping oxygen functionalities from basal plane or edge of graphene samples.
